# Supplementary material for: Effects of SLCO1B1 Genetic Variant on Metabolite Profile in Participants on Simvastatin Treatment
Source: MDPI journal article supplement (doi:10.3390/metabo12121159), 2022-11-22
Supplement: s1 [file s1]

**Supplementary Table S1.** Statistically significant associations of SLCO1B1 rs4149056-C with metabolites in participants with simvastatin treatment (N=1368).

| Metabolite                                       | Beta  | P        | Subclass                                                | Novel (Ref)     |
|--------------------------------------------------|-------|----------|---------------------------------------------------------|-----------------|
| <b>Lipids</b>                                    |       |          |                                                         |                 |
| <b>Steroids</b>                                  |       |          |                                                         |                 |
| 5alpha-androstan-3alpha,17beta-diol disulfate    | 0,174 | 4,60E-10 | Androgenic Steroids                                     | Yes             |
| Androstenediol (3beta,17beta) disulfate (2)      | 0,144 | 8,40E-08 | Androgenic Steroids                                     | No (25)         |
| 5alpha-androstan-3beta,17beta-diol disulfate     | 0,124 | 4,30E-06 | Androgenic Steroids                                     | Yes             |
| Androstenediol (3alpha, 17alpha) monosulfate (3) | 0,120 | 9,00E-06 | Androgenic Steroids                                     | No (21)         |
| Pregnenolone sulfate                             | 0,192 | 1,30E-12 | Pregnenolone Steroids                                   | No (21)         |
| Pregnenediol disulfate (C21H34O8S2)*             | 0,130 | 1,40E-06 | Pregnenolone Steroids                                   | Yes             |
| 21-hydroxypregnenolone disulfate                 | 0,120 | 9,50E-06 | Pregnenolone Steroids                                   | Yes             |
| Pregnanolone/allopregnanolone sulfate            | 0,213 | 1,30E-07 | Progestin Steroids                                      | Yes             |
| Pregnanediol-3-glucuronide                       | 0,168 | 1,50E-09 | Progestin Steroids                                      | Yes             |
| 5alpha-pregnan-3beta,20alpha-diol disulfate      | 0,117 | 1,50E-05 | Progestin Steroids                                      | Yes             |
| <b>Endocannabinoids</b>                          |       |          |                                                         |                 |
| N-oleoylserine                                   | 0,136 | 6,80E-07 | Endocannabinoid                                         | Yes             |
| <b>Dicarboxylic acids</b>                        |       |          |                                                         |                 |
| Octadecenedioylcarnitine (C18:1-DC)*             | 0,386 | 2,50E-45 | Fatty Acid Metabolism (Acyl Carnitine, Dicarboxylate)   | Yes             |
| Octadecanedioylcarnitine (C18-DC)*               | 0,311 | 2,40E-27 | Fatty Acid Metabolism (Acyl Carnitine, Dicarboxylate)   | Yes             |
| Eicosenoylcarnitine (C20:1)*                     | 0,118 | 2,50E-05 | Fatty Acid Metabolism (Acyl Carnitine, Monounsaturated) | Yes             |
| Hexadecenedioate (C16:1-DC)*                     | 0,409 | 1,60E-56 | Fatty Acid, Dicarboxylate                               | Yes             |
| Octadecenedioate (C18:1-DC)                      | 0,369 | 1,30E-45 | Fatty Acid, Dicarboxylate                               | Yes             |
| Octadecadienedioate (C18:2-DC)*                  | 0,358 | 9,00E-43 | Fatty Acid, Dicarboxylate                               | Yes             |
| Hexadecanedioate (C16-DC)                        | 0,351 | 4,80E-41 | Fatty Acid, Dicarboxylate                               | No (23,25)      |
| Tetradecanedioate (C14-DC)                       | 0,336 | 1,30E-37 | Fatty Acid, Dicarboxylate                               | No (21, 23, 25) |
| Octadecanedioate (C18-DC)                        | 0,133 | 7,60E-07 | Fatty Acid, Dicarboxylate                               | No (23,25)      |
| <b>Glycerophospholipids</b>                      |       |          |                                                         |                 |
| 1-linoleoyl-GPG (18:2)*                          | 0,284 | 2,50E-22 | Lysophospholipid                                        | Yes             |
| 1-oleoyl-GPG (18:1)*                             | 0,275 | 6,80E-19 | Lysophospholipid                                        | Yes             |
| 1-palmitoyl-GPG (16:0)*                          | 0,162 | 8,10E-09 | Lysophospholipid                                        | Yes             |

|                                                |       |           |                                     |               |
|------------------------------------------------|-------|-----------|-------------------------------------|---------------|
| 1-docosahexaenoyl-GPE (22:6)*                  | 0,145 | 6,30E-08  | Lysophospholipid                    | Yes           |
| 1-stearoyl-GPG (18:0)                          | 0,143 | 2,50E-06  | Lysophospholipid                    | Yes           |
| 2-docosahexaenoyl-GPE (22:6)*                  | 0,135 | 1,80E-06  | Lysophospholipid                    | No<br>(21)    |
| 1-arachidonoyl-GPE (20:4n6)*                   | 0,125 | 3,30E-06  | Lysophospholipid                    | No<br>(21,25) |
| 1-eicosapentaenoyl-GPE (20:5)*                 | 0,121 | 7,70E-06  | Lysophospholipid                    | Yes           |
| 1-linoleoyl-GPI (18:2)*                        | 0,114 | 2,50E-05  | Lysophospholipid                    | Yes           |
| 1-palmitoleoyl-GPC (16:1)*                     | 0,111 | 3,50E-05  | Lysophospholipid                    | No<br>(21)    |
| <b>Bile acids</b>                              |       |           |                                     |               |
| Glycochenodeoxycholate glucuronide (1)         | 0,630 | 1,70E-150 | Primary Bile Acid Metabolism        | No<br>(25)    |
| Glycochenodeoxycholate 3-sulfate               | 0,117 | 1,60E-05  | Primary Bile Acid Metabolism        | Yes           |
| Glycochenolate sulfate*                        | 0,416 | 1,40E-58  | Secondary Bile Acid Metabolism      | No<br>(21,26) |
| Glycodeoxycholate 3-sulfate                    | 0,294 | 7,20E-27  | Secondary Bile Acid Metabolism      | No<br>(21,25) |
| Deoxycholic acid 12-sulfate*                   | 0,285 | 6,60E-20  | Secondary Bile Acid Metabolism      | Yes           |
| Taurochenolate sulfate*                        | 0,254 | 1,30E-21  | Secondary Bile Acid Metabolism      | Yes           |
| Taurodeoxycholic acid 3-sulfate                | 0,249 | 2,10E-14  | Secondary Bile Acid Metabolism      | Yes           |
| Deoxycholic acid glucuronide                   | 0,189 | 6,10E-12  | Secondary Bile Acid Metabolism      | Yes           |
| Glycoursodeoxycholic acid sulfate (1)          | 0,174 | 1,40E-07  | Secondary Bile Acid Metabolism      | Yes           |
| Glycolithocholate sulfate*                     | 0,154 | 1,00E-08  | Secondary Bile Acid Metabolism      | Yes           |
| Lithocholate sulfate (1)                       | 0,128 | 5,50E-06  | Secondary Bile Acid Metabolism      | Yes           |
| <b>Cofactor and vitamins</b>                   |       |           |                                     |               |
| Bilirubin (E,Z or Z,E)*                        | 0,12  | 2,20E-05  | Hemoglobin and Porphyrin Metabolism | No<br>(19)    |
| Biliverdin                                     | 0,118 | 1,20E-05  | Hemoglobin and Porphyrin Metabolism | Yes           |
| <b>Partially characterized molecules</b>       |       |           |                                     |               |
| GlcnaC sulfate conjugate of C21H34O2 steroid** | 0,389 | 8,20E-36  | Partially Characterized Molecules   | Yes           |
| Metabolonic lactone sulfate                    | 0,262 | 7,60E-23  | Partially Characterized Molecules   | No<br>(26)    |

Standardized beta and P value based on linear regression analyses. 1009 metabolites included in analyses. Metabolites with P<5,0E-05 are listed.

**Supplementary Table S2.** Statistically significant associations of SLCO1B1 rs4149056-C with metabolites in participants without statin treatment (N=1368).

| Metabolite                                          | Beta  | P-value  | Subclass                                              | Novel (Ref.) |
|-----------------------------------------------------|-------|----------|-------------------------------------------------------|--------------|
| <b>Lipids</b>                                       |       |          |                                                       |              |
| <b>Steroids</b>                                     |       |          |                                                       |              |
| 5alpha-androstan-3alpha,17beta-diol disulfate       | 0,178 | 2,10E-10 | Androgenic Steroids                                   | Yes          |
| Androstenediol (3alpha, 17alpha) monosulfate (3)    | 0,159 | 3,50E-09 | Androgenic Steroids                                   | Yes          |
| Androstenediol (3beta,17beta) disulfate (2)         | 0,133 | 7,40E-07 | Androgenic Steroids                                   | No (25)      |
| 5alpha-androstan-3alpha,17beta-diol monosulfate (1) | 0,132 | 2,40E-06 | Androgenic Steroids                                   | Yes          |
| 5alpha-androstan-3beta,17beta-diol disulfate        | 0,112 | 3,50E-05 | Androgenic Steroids                                   | Yes          |
| 21-hydroxypregnenolone monosulfate (1)              | 0,211 | 1,90E-06 | Pregnenolone Steroids                                 | Yes          |
| Pregnenolone sulfate                                | 0,178 | 7,80E-11 | Pregnenolone Steroids                                 | Yes          |
| 21-hydroxypregnenolone disulfate                    | 0,131 | 1,30E-06 | Pregnenolone Steroids                                 | Yes          |
| Pregnenediol disulfate (C21H34O8S2)*                | 0,115 | 2,10E-05 | Pregnenolone Steroids                                 | Yes          |
| Pregnanolone/allopregnanolone sulfate               | 0,233 | 4,40E-07 | Progestin Steroids                                    | Yes          |
| Pregnanediol-3-glucuronide                          | 0,171 | 2,40E-09 | Progestin Steroids                                    | Yes          |
| 5alpha-pregnan-3beta,20alpha-diol disulfate         | 0,150 | 3,30E-08 | Progestin Steroids                                    | Yes          |
| 5alpha-pregnan-3beta,20beta-diol monosulfate (1)    | 0,149 | 5,10E-07 | Progestin Steroids                                    | Yes          |
| <b>Dicarboxylic acids</b>                           |       |          |                                                       |              |
| Octadecenedioylcarnitine (C18:1-DC)*                | 0,351 | 2,50E-36 | Fatty Acid Metabolism (Acyl Carnitine, Dicarboxylate) | Yes          |
| Octadecanedioylcarnitine (C18-DC)*                  | 0,286 | 6,70E-24 | Fatty Acid Metabolism (Acyl Carnitine, Dicarboxylate) | Yes          |
| Octadecadienedioate (C18:2-DC)*                     | 0,416 | 1,80E-58 | Fatty Acid, Dicarboxylate                             | Yes          |
| Octadecenedioate (C18:1-DC)                         | 0,377 | 2,00E-47 | Fatty Acid, Dicarboxylate                             | Yes          |
| Hexadecenedioate (C16:1-DC)*                        | 0,358 | 2,20E-42 | Fatty Acid, Dicarboxylate                             | Yes          |
| Tetradecanedioate (C14-DC)                          | 0,342 | 8,50E-39 | Fatty Acid, Dicarboxylate                             | No (23,25)   |
| Hexadecanedioate (C16-DC)                           | 0,309 | 1,40E-31 | Fatty Acid, Dicarboxylate                             | No (23,25)   |

|                                                |       |           |                                     |            |
|------------------------------------------------|-------|-----------|-------------------------------------|------------|
| Octadecanedioate (C18-DC)                      | 0,172 | 1,60E-10  | Fatty Acid, Dicarboxylate           | No (23,25) |
| Eicosanedioate (C20-DC)                        | 0,137 | 3,50E-07  | Fatty Acid, Dicarboxylate           | Yes        |
| Tetradecadienedioate (C14:2-DC)*               | 0,130 | 2,00E-06  | Fatty Acid, Dicarboxylate           | Yes        |
| Dodecanedioate (C12-DC)                        | 0,116 | 1,90E-05  | Fatty Acid, Dicarboxylate           | Yes        |
| Docosadioate (C22-DC)                          | 0,110 | 4,70E-05  | Fatty Acid, Dicarboxylate           | Yes        |
| <b>Glycerophospholipids</b>                    |       |           |                                     |            |
| 1-oleoyl-GPG (18:1)*                           | 0,224 | 1,90E-10  | Lysophospholipid                    | Yes        |
| 1-linoleoyl-GPG (18:2)*                        | 0,189 | 1,80E-08  | Lysophospholipid                    | Yes        |
| 1-linoleoyl-GPE (18:2)*                        | 0,114 | 2,20E-05  | Lysophospholipid                    | Yes        |
| 1-arachidonoyl-GPE (20:4n6)*                   | 0,114 | 2,30E-05  | Lysophospholipid                    | No (23)    |
| <b>Bile acids</b>                              |       |           |                                     |            |
| Glycochenodeoxycholate glucuronide (1)         | 0,622 | 8,40E-140 | Primary Bile Acid Metabolism        | No (25)    |
| Glycocholenate sulfate*                        | 0,352 | 4,10E-41  | Secondary Bile Acid Metabolism      | No (21,26) |
| Glycodeoxycholate 3-sulfate                    | 0,289 | 8,40E-26  | Secondary Bile Acid Metabolism      | No (21,25) |
| Taurodeoxycholic acid 3-sulfate                | 0,271 | 2,10E-15  | Secondary Bile Acid Metabolism      | Yes        |
| Deoxycholic acid 12-sulfate*                   | 0,247 | 1,60E-15  | Secondary Bile Acid Metabolism      | Yes        |
| Taurocholenate sulfate*                        | 0,234 | 1,90E-18  | Secondary Bile Acid Metabolism      | Yes        |
| Glycolithocholate sulfate*                     | 0,137 | 3,80E-07  | Secondary Bile Acid Metabolism      | Yes        |
| Deoxycholic acid glucuronide                   | 0,132 | 2,80E-06  | Secondary Bile Acid Metabolism      | Yes        |
| <b>Cofactors and vitamins</b>                  |       |           |                                     |            |
| Bilirubin (E,Z or Z,E)*                        | 0,120 | 2,80E-05  | Hemoglobin and Porphyrin Metabolism | No (24)    |
| <b>Partially characterized molecules</b>       |       |           |                                     |            |
| GlcnaC sulfate conjugate of C21H34O2 steroid** | 0,293 | 1,20E-18  | Partially Characterized Molecules   | Yes        |
| Metabolonic lactone sulfate                    | 0,258 | 9,20E-22  | Partially Characterized Molecules   | Yes        |

Standardized beta and P value based on linear regression analyses. 1009 metabolites included in analyses. Metabolites with P<5,0E-05 are listed.
